# Supplementary material
Source: PubMed Central journal article supplement (PMC9998338)
Supplement: NIHMS1841867-supplement-Supp2.pdf [file NIHMS1841867-supplement-Supp2.pdf]

**Supplementary Table 1: The demographic and clinical information of patients**

| <b>ID</b> | <b>Disease Type</b> | <b>Disease location at tissue sampling</b> | <b>Disease behaviour at time of tissue sampling</b> | <b>Age at tissue sampling</b> | <b>Sex</b> | <b>Medications at the time of tissue sampling</b> | <b>Anti_TNF antibody or not at time of tissue sampling</b> | <b>Experiment</b> |
|-----------|---------------------|--------------------------------------------|-----------------------------------------------------|-------------------------------|------------|---------------------------------------------------|------------------------------------------------------------|-------------------|
| 1         | UC                  | Proctitis                                  | Mayo 1 (Mild)                                       | 29                            | Female     | None                                              | No                                                         | scRNAseq          |
| 2         | UC                  | Left sided                                 | Mayo 1 (Mild)                                       | 30                            | Male       | Mesalamine                                        | No                                                         | scRNAseq          |
| 3         | UC                  | Proctitis                                  | Mayo 3 (Severe)                                     | 26                            | Male       | None                                              | No                                                         | scRNAseq          |
| 4         | UC                  | Proctitis                                  | Mayo 2 (Moderate)                                   | 39                            | Female     | Mesalamine                                        | No                                                         | scRNAseq          |
| 5         | IBD                 | Left sided                                 | N/A                                                 | 62                            | Female     | Pentasa                                           | No                                                         | bulk RNA seq      |
| 6         | UC                  | Left sided                                 | Mayo 1 (Mild)                                       | 34                            | Female     | 6MP and Humira                                    | Yes                                                        | bulk RNA seq      |
| 7         | UC                  | Left sided                                 | Mayo 2 (Moderate)                                   | 27                            | Male       | Mesalimine                                        | No                                                         | bulk RNA seq      |
| 8         | Heathy              | N/A                                        | N/A                                                 | 53                            | Male       | No                                                | No                                                         | bulk RNA seq      |
| 9         | Heathy              | N/A                                        | N/A                                                 | 53                            | Male       | No                                                | No                                                         | ROS               |
| 10        | Heathy              | N/A                                        | N/A                                                 | 12                            | Female     | No                                                | No                                                         | ROS               |
