# Supplementary material
Source: PubMed Central journal article supplement (PMC9998338)
Supplement: NIHMS1841867-supplement-Supp3.pdf [file NIHMS1841867-supplement-Supp3.pdf]

**Supplementary Table 2: The differentially expressed Transcription factor in UC epithelium and colonoid (Relate to Figure 2D)**

The differentially expressed transcripton factors between inflamed vs uninflamed in UC epithelium

|               | <b>p_val</b> | <b>avg_log2FC</b> | <b>pct.1</b> | <b>pct.2</b> | <b>p_val_adj</b> |
|---------------|--------------|-------------------|--------------|--------------|------------------|
| <b>IRF1</b>   | 3.220E-15    | 0.633             | 0.539        | 0.249        | 6.231E-11        |
| <b>STAT1</b>  | 3.038E-12    | 0.515             | 0.359        | 0.141        | 5.880E-08        |
| <b>STAT3</b>  | 6.409E-12    | 0.281             | 0.645        | 0.374        | 1.240E-07        |
| <b>CEBPD</b>  | 2.096E-11    | 0.463             | 0.465        | 0.224        | 4.056E-07        |
| <b>HES6</b>   | 2.806E-09    | 0.380             | 0.335        | 0.141        | 5.430E-05        |
| <b>HIF1A</b>  | 4.056E-09    | 0.271             | 0.359        | 0.166        | 7.848E-05        |
| <b>XBP1</b>   | 9.188E-09    | 0.468             | 0.722        | 0.540        | 1.778E-04        |
| <b>RBCK1</b>  | 1.525E-08    | 0.301             | 0.518        | 0.300        | 2.951E-04        |
| <b>ZNF511</b> | 2.870E-08    | 0.298             | 0.437        | 0.242        | 5.555E-04        |
| <b>HMGN3</b>  | 2.873E-08    | 0.392             | 0.539        | 0.335        | 5.559E-04        |
| <b>GTF3A</b>  | 3.519E-08    | 0.396             | 0.510        | 0.300        | 6.810E-04        |
| <b>NFIC</b>   | 4.003E-08    | 0.323             | 0.363        | 0.176        | 7.747E-04        |
| <b>RUNX1</b>  | 8.142E-08    | 0.267             | 0.216        | 0.074        | 1.575E-03        |
| <b>FOS</b>    | 4.606E-07    | -0.502            | 0.902        | 0.924        | 8.912E-03        |
| <b>DNMT1</b>  | 6.881E-07    | 0.347             | 0.298        | 0.145        | 1.332E-02        |
| <b>EHF</b>    | 7.749E-07    | 0.320             | 0.514        | 0.339        | 1.500E-02        |
| <b>HMGA1</b>  | 8.961E-07    | 0.430             | 0.551        | 0.395        | 1.734E-02        |

The differentially expressed transcription factors between TNF treated vs. Untreated in colonoid

|               | <b>p_val</b> | <b>avg_log2FC</b> | <b>pct.1</b> | <b>pct.2</b> | <b>p_val_adj</b> |
|---------------|--------------|-------------------|--------------|--------------|------------------|
| <b>Nfic</b>   | 2.856E-277   | 0.233             | 0.631        | 0.438        | 4.947E-273       |
| <b>Irf1</b>   | 8.304E-182   | 0.126             | 0.431        | 0.276        | 1.438E-177       |
| <b>Hmga1</b>  | 5.935E-133   | 0.064             | 0.251        | 0.143        | 1.028E-128       |
| <b>Cebpd</b>  | 1.804E-91    | 0.117             | 0.577        | 0.451        | 3.125E-87        |
| <b>Stat1</b>  | 2.415E-71    | 0.047             | 0.224        | 0.146        | 4.183E-67        |
| <b>Hes6</b>   | 1.714E-52    | -0.243            | 0.759        | 0.725        | 2.969E-48        |
| <b>Rbck1</b>  | 3.474E-50    | 0.040             | 0.521        | 0.411        | 6.016E-46        |
| <b>Ehf</b>    | 4.427E-49    | -0.224            | 0.779        | 0.730        | 7.667E-45        |
| <b>Zfp511</b> | 1.930E-45    | 0.020             | 0.332        | 0.252        | 3.342E-41        |
| <b>Dnmt1</b>  | 3.571E-45    | 0.044             | 0.419        | 0.329        | 6.185E-41        |
| <b>Runx1</b>  | 5.568E-45    | 0.027             | 0.395        | 0.306        | 9.644E-41        |
| <b>Fos</b>    | 2.700E-42    | 0.075             | 0.634        | 0.526        | 4.677E-38        |
| <b>Stat3</b>  | 4.589E-36    | 0.031             | 0.530        | 0.431        | 7.947E-32        |
| <b>Xbp1</b>   | 3.181E-33    | 0.052             | 0.811        | 0.709        | 5.509E-29        |
| <b>Hif1a</b>  | 1.047E-25    | 0.003             | 0.542        | 0.449        | 1.814E-21        |
| <b>Gtf3a</b>  | 6.862E-07    | -0.041            | 0.711        | 0.619        | 1.188E-02        |
| <b>Hmgn3</b>  | 1.242E-01    | -0.003            | 0.003        | 0.004        | 1.000E+00        |
