# Supplementary material
Source: PubMed Central journal article supplement (PMC9998338)
Supplement: NIHMS1841867-supplement-Supp4.pdf [file NIHMS1841867-supplement-Supp4.pdf]

### Supplementary Table 3: The raw cell count for M cell induction (Relate to Figure 4D)

#### The raw cell count for Nox1 WT samples

| WT_1       |              |      |      |  |       |      |       |  |              |      |       |
|------------|--------------|------|------|--|-------|------|-------|--|--------------|------|-------|
|            | No treatment |      |      |  | RANKL |      |       |  | TNF $\alpha$ |      |       |
|            | UEA-1        | DAPI | %    |  | UEA-1 | DAPI | %     |  | UEA-1        | DAPI | %     |
| Location 1 | 23           | 612  | 3.76 |  | 19    | 262  | 7.25  |  | 35           | 303  | 11.55 |
| Location 2 | 1            | 487  | 0.21 |  | 43    | 333  | 12.91 |  | 37           | 257  | 14.40 |
| Location 3 | 11           | 362  | 3.04 |  | 4     | 175  | 2.29  |  | 16           | 268  | 5.97  |
| Location 4 | 1            | 176  | 0.57 |  | 6     | 285  | 2.11  |  | 12           | 292  | 4.11  |
| Location 5 | 20           | 279  | 7.17 |  | 20    | 316  | 6.33  |  | 3            | 173  | 1.73  |
| Location 6 | 1            | 252  | 0.40 |  | 3     | 163  | 1.84  |  | 2            | 159  | 1.26  |
| Location 7 | 7            | 313  | 2.24 |  | 14    | 372  | 3.76  |  | 19           | 283  | 6.71  |
|            |              | AVE  | 2.48 |  |       | AVE  | 5.21  |  |              | AVE  | 6.53  |

| WT_2       |              |      |       |  |       |      |       |  |              |      |       |
|------------|--------------|------|-------|--|-------|------|-------|--|--------------|------|-------|
|            | No treatment |      |       |  | RANKL |      |       |  | TNF $\alpha$ |      |       |
|            | UEA-1        | DAPI | %     |  | UEA-1 | DAPI | %     |  | UEA-1        | DAPI | %     |
| Location 1 | 14           | 427  | 3.28  |  | 111   | 380  | 29.21 |  | 19           | 371  | 5.12  |
| Location 2 | 32           | 319  | 10.03 |  | 19    | 226  | 8.41  |  | 77           | 441  | 17.46 |
| Location 3 | 53           | 568  | 9.33  |  | 46    | 524  | 8.78  |  | 10           | 240  | 4.17  |
| Location 4 | 45           | 314  | 14.33 |  | 9     | 201  | 4.48  |  | 26           | 190  | 13.68 |
| Location 5 | 0            | 149  | 0.00  |  | 15    | 247  | 6.07  |  | 20           | 284  | 7.04  |
| Location 6 | 9            | 240  | 3.75  |  | 14    | 219  | 6.39  |  | 19           | 237  | 8.02  |
| Location 7 | 0            | 232  | 0.00  |  | 60    | 417  | 14.39 |  | 44           | 357  | 12.32 |
|            |              | AVE  | 5.82  |  |       | AVE  | 11.10 |  |              | AVE  | 9.69  |

| WT_3       |              |      |       |  |       |      |       |  |              |      |       |
|------------|--------------|------|-------|--|-------|------|-------|--|--------------|------|-------|
|            | No treatment |      |       |  | RANKL |      |       |  | TNF $\alpha$ |      |       |
|            | UEA-1        | DAPI | %     |  | UEA-1 | DAPI | %     |  | UEA-1        | DAPI | %     |
| Location 1 | 63           | 485  | 12.99 |  | 24    | 200  | 12.00 |  | 23           | 258  | 8.91  |
| Location 2 | 28           | 512  | 5.47  |  | 7     | 231  | 3.03  |  | 158          | 380  | 41.58 |
| Location 3 | 7            | 340  | 2.06  |  | 0     | 243  | 0.00  |  | 8            | 218  | 3.67  |
| Location 4 | 26           | 333  | 7.81  |  | 6     | 206  | 2.91  |  | 8            | 283  | 2.83  |
| Location 5 | 7            | 321  | 2.18  |  | 65    | 342  | 19.01 |  | 4            | 178  | 2.25  |
| Location 6 | 0            | 265  | 0.00  |  | 149   | 603  | 24.71 |  | 6            | 259  | 2.32  |
| Location 7 | 59           | 402  | 14.68 |  | 111   | 475  | 23.37 |  | 25           | 270  | 9.26  |
|            |              | AVE  | 6.45  |  |       | AVE  | 12.15 |  |              | AVE  | 10.12 |

| <b>WT_4</b> |              |      |       |  |       |      |       |  |              |      |       |
|-------------|--------------|------|-------|--|-------|------|-------|--|--------------|------|-------|
|             | No treatment |      |       |  | RANKL |      |       |  | TNF $\alpha$ |      |       |
|             | UEA-1        | DAPI | %     |  | UEA-1 | DAPI | %     |  | UEA-1        | DAPI | %     |
| Location 1  | 77           | 419  | 18.38 |  | 100   | 548  | 18.25 |  | 47           | 437  | 10.76 |
| Location 2  | 63           | 472  | 13.35 |  | 136   | 561  | 24.24 |  | 103          | 434  | 23.73 |
| Location 3  | 74           | 487  | 15.20 |  | 127   | 379  | 33.51 |  | 167          | 500  | 33.40 |
| Location 4  | 94           | 580  | 16.21 |  | 65    | 539  | 12.06 |  | 53           | 466  | 11.37 |
| Location 5  | 81           | 396  | 20.45 |  | 93    | 342  | 27.19 |  | 212          | 581  | 36.49 |
| Location 6  | 46           | 393  | 11.70 |  | 101   | 434  | 23.27 |  | 85           | 409  | 20.78 |
| Location 7  | 68           | 506  | 13.44 |  | 162   | 545  | 29.72 |  | 53           | 516  | 10.27 |
|             |              | AVE  | 15.53 |  |       | AVE  | 24.04 |  |              | AVE  | 20.97 |

| <b>WT_5</b> |              |      |       |  |       |      |       |  |              |      |       |
|-------------|--------------|------|-------|--|-------|------|-------|--|--------------|------|-------|
|             | No treatment |      |       |  | RANKL |      |       |  | TNF $\alpha$ |      |       |
|             | UEA-1        | DAPI | %     |  | UEA-1 | DAPI | %     |  | UEA-1        | DAPI | %     |
| Location 1  | 117          | 630  | 18.57 |  | 120   | 438  | 27.40 |  | 280          | 596  | 46.98 |
| Location 2  | 32           | 495  | 6.46  |  | 35    | 312  | 11.22 |  | 50           | 505  | 9.90  |
| Location 3  | 34           | 342  | 9.94  |  | 12    | 276  | 4.35  |  | 78           | 460  | 16.96 |
| Location 4  | 111          | 378  | 29.37 |  | 3     | 361  | 0.83  |  | 47           | 412  | 11.41 |
| Location 5  | 19           | 514  | 3.70  |  | 129   | 606  | 21.29 |  | 74           | 536  | 13.81 |
| Location 6  | 52           | 341  | 15.25 |  | 188   | 520  | 36.15 |  | 101          | 531  | 19.02 |
| Location 7  | 10           | 220  | 4.55  |  | 18    | 425  | 4.24  |  | 47           | 276  | 17.03 |
|             |              | AVE  | 12.55 |  |       | AVE  | 15.07 |  |              | AVE  | 19.30 |

| <b>WT_6</b> |              |      |       |  |       |      |       |  |              |      |       |
|-------------|--------------|------|-------|--|-------|------|-------|--|--------------|------|-------|
|             | No treatment |      |       |  | RANKL |      |       |  | TNF $\alpha$ |      |       |
|             | UEA-1        | DAPI | %     |  | UEA-1 | DAPI | %     |  | UEA-1        | DAPI | %     |
| Location 1  | 102          | 610  | 16.72 |  | 64    | 434  | 14.75 |  | 44           | 323  | 13.62 |
| Location 2  | 52           | 555  | 9.37  |  | 60    | 353  | 16.92 |  | 29           | 253  | 11.44 |
| Location 3  | 16           | 446  | 3.59  |  | 94    | 502  | 18.73 |  | 38           | 444  | 8.56  |
| Location 4  | 25           | 406  | 6.16  |  | 48    | 451  | 10.64 |  | 43           | 448  | 9.60  |
| Location 5  | 73           | 323  | 22.60 |  | 23    | 438  | 5.25  |  | 115          | 606  | 18.98 |
| Location 6  | 27           | 331  | 8.16  |  | 76    | 498  | 15.26 |  | 12           | 472  | 2.54  |
| Location 7  | 27           | 379  | 7.12  |  | 36    | 412  | 8.74  |  | 33           | 526  | 6.27  |
|             |              | AVE  | 10.53 |  |       | AVE  | 12.90 |  |              | AVE  | 10.14 |

# The raw cell count for Nox1KO samples

| KO_1       |              |      |       |  |       |      |       |  |              |      |       |
|------------|--------------|------|-------|--|-------|------|-------|--|--------------|------|-------|
|            | No treatment |      |       |  | RANKL |      |       |  | TNF $\alpha$ |      |       |
|            | UEA-1        | DAPI | %     |  | UEA-1 | DAPI | %     |  | UEA-1        | DAPI | %     |
| Location 1 | 87           | 743  | 11.71 |  | 296   | 572  | 51.75 |  | 218          | 496  | 43.95 |
| Location 2 | 130          | 563  | 23.09 |  | 80    | 410  | 19.51 |  | 371          | 660  | 56.21 |
| Location 3 | 16           | 298  | 5.37  |  | 72    | 462  | 15.58 |  | 67           | 535  | 12.52 |
| Location 4 | 11           | 479  | 2.30  |  | 34    | 395  | 8.61  |  | 109          | 647  | 16.85 |
| Location 5 | 15           | 340  | 4.41  |  | 150   | 516  | 29.07 |  | 45           | 417  | 10.79 |
| Location 6 | 37           | 194  | 19.07 |  | 158   | 477  | 33.12 |  | 391          | 692  | 56.50 |
| Location 7 | 94           | 652  | 14.42 |  | 54    | 477  | 11.32 |  | 191          | 636  | 30.03 |
|            |              | AVE  | 11.48 |  |       | AVE  | 24.14 |  |              | AVE  | 32.41 |

| KO_2       |              |      |       |  |       |      |       |  |              |      |       |
|------------|--------------|------|-------|--|-------|------|-------|--|--------------|------|-------|
|            | No treatment |      |       |  | RANKL |      |       |  | TNF $\alpha$ |      |       |
|            | UEA-1        | DAPI | %     |  | UEA-1 | DAPI | %     |  | UEA-1        | DAPI | %     |
| Location 1 | 120          | 732  | 16.39 |  | 117   | 665  | 17.59 |  | 375          | 590  | 63.56 |
| Location 2 | 176          | 628  | 28.03 |  | 147   | 590  | 24.92 |  | 147          | 475  | 30.95 |
| Location 3 | 5            | 206  | 2.43  |  | 69    | 583  | 11.84 |  | 26           | 286  | 9.09  |
| Location 4 | 103          | 575  | 17.91 |  | 47    | 287  | 16.38 |  | 109          | 442  | 24.66 |
| Location 5 | 102          | 495  | 20.61 |  | 144   | 591  | 24.37 |  | 121          | 466  | 25.97 |
| Location 6 | 22           | 436  | 5.05  |  | 90    | 385  | 23.38 |  | 96           | 430  | 22.33 |
| Location 7 | 36           | 218  | 16.51 |  | 246   | 624  | 39.42 |  | 143          | 647  | 22.10 |
|            |              | AVE  | 15.27 |  |       | AVE  | 22.56 |  |              | AVE  | 28.38 |

| KO_3       |              |      |       |  |       |      |       |  |              |      |       |
|------------|--------------|------|-------|--|-------|------|-------|--|--------------|------|-------|
|            | No treatment |      |       |  | RANKL |      |       |  | TNF $\alpha$ |      |       |
|            | UEA-1        | DAPI | %     |  | UEA-1 | DAPI | %     |  | UEA-1        | DAPI | %     |
| Location 1 | 136          | 802  | 16.96 |  | 72    | 427  | 16.86 |  | 93           | 563  | 16.52 |
| Location 2 | 14           | 354  | 3.95  |  | 160   | 600  | 26.67 |  | 236          | 602  | 39.20 |
| Location 3 | 68           | 404  | 16.83 |  | 287   | 478  | 60.04 |  | 188          | 586  | 32.08 |
| Location 4 | 10           | 309  | 3.24  |  | 78    | 257  | 30.35 |  | 10           | 257  | 3.89  |
| Location 5 | 0            | 183  | 0.00  |  | 71    | 601  | 11.81 |  | 52           | 537  | 9.68  |
| Location 6 | 43           | 459  | 9.37  |  | 53    | 430  | 12.33 |  | 68           | 482  | 14.11 |
| Location 7 | 126          | 671  | 18.78 |  | 339   | 843  | 40.21 |  | 139          | 683  | 20.35 |
|            |              | AVE  | 9.88  |  |       | AVE  | 28.32 |  |              | AVE  | 19.41 |

**KO\_4**

|            | No treatment |      |       |  | RANKL |      |       |  | TNF $\alpha$ |      |       |
|------------|--------------|------|-------|--|-------|------|-------|--|--------------|------|-------|
|            | UEA-1        | DAPI | %     |  | UEA-1 | DAPI | %     |  | UEA-1        | DAPI | %     |
| Location 1 | 174          | 602  | 28.90 |  | 137   | 556  | 24.64 |  | 209          | 575  | 36.35 |
| Location 2 | 53           | 215  | 24.65 |  | 177   | 478  | 37.03 |  | 214          | 602  | 35.55 |
| Location 3 | 91           | 518  | 17.57 |  | 220   | 582  | 37.80 |  | 216          | 609  | 35.47 |
| Location 4 | 14           | 365  | 3.84  |  | 172   | 452  | 38.05 |  | 57           | 315  | 18.10 |
| Location 5 | 13           | 198  | 6.57  |  | 166   | 519  | 31.98 |  | 115          | 378  | 30.42 |
| Location 6 | 120          | 448  | 26.79 |  | 294   | 773  | 38.03 |  | 206          | 494  | 41.70 |
| Location 7 | 188          | 673  | 27.93 |  | 174   | 722  | 24.10 |  | 420          | 665  | 63.16 |
|            |              | AVE  | 19.46 |  |       | AVE  | 33.09 |  |              | AVE  | 37.25 |

**KO\_5**

|            | No treatment |      |       |  | RANKL |      |       |  | TNF $\alpha$ |      |       |
|------------|--------------|------|-------|--|-------|------|-------|--|--------------|------|-------|
|            | UEA-1        | DAPI | %     |  | UEA-1 | DAPI | %     |  | UEA-1        | DAPI | %     |
| Location 1 | 147          | 746  | 19.71 |  | 158   | 514  | 30.74 |  | 195          | 635  | 30.71 |
| Location 2 | 51           | 415  | 12.29 |  | 73    | 414  | 17.63 |  | 229          | 589  | 38.88 |
| Location 3 | 16           | 352  | 4.55  |  | 202   | 651  | 31.03 |  | 254          | 638  | 39.81 |
| Location 4 | 82           | 424  | 19.34 |  | 267   | 595  | 44.87 |  | 160          | 539  | 29.68 |
| Location 5 | 52           | 354  | 14.69 |  | 67    | 445  | 15.06 |  | 210          | 505  | 41.58 |
| Location 6 | 29           | 367  | 7.90  |  | 207   | 516  | 40.12 |  | 45           | 366  | 12.30 |
| Location 7 | 47           | 379  | 12.40 |  | 145   | 502  | 28.88 |  | 60           | 524  | 11.45 |
|            |              | AVE  | 12.98 |  |       | AVE  | 29.76 |  |              | AVE  | 29.20 |

**KO\_6**

|            | No treatment |      |       |  | RANKL |      |       |  | TNF $\alpha$ |      |       |
|------------|--------------|------|-------|--|-------|------|-------|--|--------------|------|-------|
|            | UEA-1        | DAPI | %     |  | UEA-1 | DAPI | %     |  | UEA-1        | DAPI | %     |
| Location 1 | 83           | 526  | 15.78 |  | 113   | 455  | 24.84 |  | 97           | 401  | 24.44 |
| Location 2 | 20           | 570  | 3.51  |  | 183   | 683  | 26.85 |  | 114          | 556  | 20.50 |
| Location 3 | 47           | 511  | 9.20  |  | 171   | 558  | 30.65 |  | 92           | 583  | 15.78 |
| Location 4 | 43           | 678  | 6.34  |  | 217   | 624  | 34.78 |  | 84           | 507  | 16.57 |
| Location 5 | 36           | 519  | 6.94  |  | 109   | 697  | 15.64 |  | 149          | 547  | 27.24 |
| Location 6 | 33           | 382  | 8.64  |  | 126   | 689  | 18.29 |  | 69           | 581  | 11.88 |
| Location 7 | 19           | 588  | 3.23  |  | 110   | 694  | 15.85 |  | 54           | 505  | 10.69 |
|            |              | AVE  | 7.66  |  |       | AVE  | 23.84 |  |              | AVE  | 18.16 |

## The summary of M cell percentage and statistical test for Nox1WT and KO samples

|              | WT_1 | WT_2 | WT_3  | WT_4  | WT_5  | WT_6  |
|--------------|------|------|-------|-------|-------|-------|
| No treatment | 2.48 | 5.82 | 6.45  | 15.53 | 12.55 | 10.53 |
| RANKL        | 5.21 | 11.1 | 12.15 | 24.04 | 15.07 | 12.80 |
| TNF $\alpha$ | 6.53 | 9.69 | 10.12 | 20.97 | 19.3  | 10.10 |

|              | KO_1  | KO_2  | KO_3  | KO_4  | KO_5  | KO_6  |
|--------------|-------|-------|-------|-------|-------|-------|
| No treatment | 11.48 | 15.27 | 9.88  | 19.46 | 12.98 | 7.60  |
| RANK         | 24.14 | 22.56 | 28.32 | 33.09 | 29.76 | 23.80 |
| TNF $\alpha$ | 32.41 | 28.38 | 19.41 | 37.25 | 29.2  | 18.16 |

## Wilcoxon test summary

| group 1         | group 2         | P value | P value Summary |
|-----------------|-----------------|---------|-----------------|
| WT_No treatment | KO_No treatment | 0.0938  | ns              |
| WT_TNF $\alpha$ | KO_TNF $\alpha$ | 0.0312  | *               |
| WT_RANKL        | KO_RANKL        | 0.0312  | *               |
| WT_No treatment | WT_TNF $\alpha$ | 0.0625  | ns              |
| WT_No treatment | WT_RANKL        | 0.0312  | *               |
