# Supplementary material
Source: PubMed Central journal article supplement (PMC9998338)
Supplement: NIHMS1841867-supplement-Supp5.pdf [file NIHMS1841867-supplement-Supp5.pdf]

**Supplementary Table 5: Principal component(PC) contribution genes**

|                     | PC1      | PC2      | PC3      | PC4      | PC5      | PC6      | PC7      | PC8      | PC9      | PC10     |
|---------------------|----------|----------|----------|----------|----------|----------|----------|----------|----------|----------|
| Proportion Variance |          |          |          |          |          |          |          |          |          |          |
| Explained of PCs    | 0.3667   | 0.1848   | 0.1042   | 0.05686  | 0.02961  | 0.02268  | 0.02064  | 0.01754  | 0.01594  | 0.01484  |
| Inflamed P Value    | 0.0002   | 2.48E-09 | 0.001379 | 0.296027 | 0.308976 | 0.769615 | 0.506565 | 0.231146 | 0.326685 | 0.249937 |
| NOX1                | 0.8605   | 0.09661  | 0.21848  | -0.15198 | -0.1154  | 0.206932 | -0.14965 | -0.11014 | -0.0248  | 0.088608 |
| MPZL2               | 0.857037 | 0.054914 | 0.308314 | -0.14426 | -0.0653  | 0.084523 | 0.047112 | -0.07686 | 0.111208 | 0.009134 |
| HOXD13              | 0.816211 | 0.041069 | -0.5596  | -0.09248 | 0.001998 | -0.03689 | 0.0319   | 0.030597 | 0.020023 | -0.0572  |
| MARCKSL1            | 0.811734 | 0.167062 | 0.09778  | -0.05453 | 0.089585 | 0.19085  | 0.057716 | -0.01459 | -0.12399 | -0.09533 |
| FERMT1              | 0.774748 | 0.093006 | 0.317198 | -0.25881 | 0.026602 | 0.268851 | -0.09189 | 0.034626 | -0.04954 | -0.10628 |
| CD9                 | 0.773613 | -0.15631 | 0.492401 | -0.10452 | -0.07829 | 0.047319 | 0.038298 | 0.007628 | 0.069259 | -0.0435  |
| TSPO                | 0.737351 | 0.199023 | 0.417693 | -0.22173 | -0.03099 | -0.0118  | 0.086012 | 0.043032 | -0.00855 | -0.06022 |
| TBL1X               | 0.734495 | 0.142789 | 0.160383 | 0.227944 | -0.14657 | -0.04337 | 0.14395  | -0.04765 | 0.00455  | 0.026586 |
| PPP1R1B             | 0.734415 | -0.21896 | 0.351855 | -0.1662  | 0.075596 | 0.329051 | -0.0564  | -0.01078 | -0.05655 | -0.19785 |
| HMGGA2              | 0.719018 | -0.46279 | 0.236085 | -0.02835 | -0.00412 | -0.00885 | -0.00967 | -0.03257 | 0.018836 | -0.02938 |
| BIK                 | 0.683105 | 0.395971 | 0.350819 | -0.18119 | -0.07773 | 0.108992 | -0.01059 | -0.04997 | 0.044954 | -0.01123 |
| ST6GALNAC4          | 0.658073 | 0.363481 | -0.07254 | -0.04841 | 0.087068 | 0.006314 | 0.227624 | 0.08478  | -0.05534 | -0.02364 |
| CD14                | 0.63263  | 0.327284 | -0.02152 | 0.206087 | -0.25151 | -0.03018 | 0.262046 | -0.09348 | 0.098557 | 0.0237   |
| IER3                | 0.631516 | 0.464206 | 0.410561 | -0.02598 | -0.0691  | -0.07116 | 0.303952 | -0.02374 | -0.04807 | 0.122812 |
| CLDN4               | 0.608239 | -0.2074  | 0.21725  | -0.53348 | -0.17849 | 0.204004 | 0.144904 | 0.126286 | -0.11802 | 0.049247 |
| GPX2                | 0.60799  | 0.395511 | 0.098253 | -0.33583 | 0.031218 | 0.407665 | -0.1225  | -0.05652 | -0.08846 | -0.11194 |
| BCL10               | 0.592079 | 0.242999 | 0.33566  | -0.50763 | -0.12767 | 0.019791 | 0.099852 | -0.00472 | 0.0034   | 0.141601 |
| PTP4A2              | 0.581147 | 0.08565  | -0.01781 | -0.24693 | 0.014993 | -0.09546 | 0.079596 | -0.05639 | 0.171726 | 0.127501 |
| TPM1                | 0.568254 | -0.27531 | -0.1412  | -0.28483 | 0.048861 | 0.058011 | -0.08548 | 0.059271 | -0.0151  | 0.155703 |
| CCND1               | 0.50845  | 0.377958 | -0.1376  | -0.0372  | 0.347135 | 0.060078 | 0.233939 | 0.020935 | -0.05571 | -0.02483 |
| ACTG1               | 0.495376 | 0.319502 | 0.363011 | -0.20081 | 0.036643 | -0.05709 | 0.100296 | 0.098817 | -0.13618 | 0.083281 |
| HMGCS2              | 0.463577 | -0.57412 | 0.505095 | 0.121038 | -0.12553 | 0.090229 | 0.195844 | 0.045254 | 0.095832 | -0.15161 |
| ABLIM1              | 0.459265 | -0.13239 | 0.304718 | -0.40102 | 0.23191  | 0.080447 | -0.03012 | 0.097199 | -0.07193 | 0.110055 |
| SOX9                | 0.458157 | -0.00053 | 0.070076 | -0.36788 | 0.225932 | 0.46941  | 0.011656 | -0.03359 | -0.13505 | -0.07331 |
| SOX4                | 0.443248 | -0.11182 | 0.054224 | 0.157952 | 0.16894  | 0.196911 | -0.03236 | -0.07297 | 0.064785 | -0.15437 |
| NR2F6               | 0.414055 | -0.37191 | 0.304581 | -0.4915  | -0.09433 | -0.00794 | 0.111288 | 0.173256 | -0.12484 | -0.13149 |
| PTMA                | 0.406113 | 0.322387 | 0.446974 | 0.181713 | 0.031176 | 0.120127 | -0.06185 | 0.005934 | -0.00828 | -0.12812 |
| PAICS               | 0.404905 | 0.286078 | 0.198147 | 0.102358 | 0.345047 | 0.176406 | -0.21259 | -0.03141 | -0.0977  | -0.03754 |
| NFIC                | 0.379594 | 0.191104 | -0.0739  | 0.208117 | 0.2474   | 0.097595 | 0.030383 | 0.180552 | -0.35789 | -0.04843 |
| NDUFA4              | 0.37726  | 0.141829 | 0.11202  | -0.18398 | 0.102997 | -0.00843 | -0.02025 | -0.03216 | 0.243327 | -0.04091 |

|         |          |          |          |          |          |          |          |          |          |          |
|---------|----------|----------|----------|----------|----------|----------|----------|----------|----------|----------|
| RPL9    | 0.366768 | -0.17801 | 0.12047  | 0.192606 | -0.01744 | 0.096405 | -0.01448 | -0.10649 | 0.23556  | -0.03476 |
| CYBA    | 0.339195 | 0.592607 | 0.366487 | 0.094516 | -0.15867 | -0.02862 | 0.099991 | -0.04114 | -0.00129 | -0.18081 |
| FBXO32  | 0.310685 | -0.43884 | 0.020207 | -0.23292 | -0.3451  | -0.03613 | 0.176522 | -0.0034  | 0.083804 | 0.181265 |
| JUNB    | 0.286453 | 0.564086 | 0.042924 | -0.19394 | -0.03574 | -0.09453 | 0.480248 | 0.005826 | -0.2009  | 0.313493 |
| SH3BGR  | 0.250605 | -0.27218 | -0.07481 | 0.148845 | -0.02682 | 0.047337 | -0.02747 | 0.101952 | 0.086584 | -0.05141 |
| GSTP1   | 0.248842 | 0.509341 | 0.37542  | -0.15652 | 0.225967 | 0.163436 | 0.028613 | 0.060634 | -0.00281 | -0.21633 |
| PLGRKT  | 0.245716 | -0.22967 | 0.167498 | -0.5297  | -0.06677 | -0.04086 | -0.0424  | -0.02132 | 0.184191 | 0.038876 |
| S100A11 | 0.238805 | 0.747801 | 0.136317 | -0.17228 | 0.233743 | 0.066061 | 0.122359 | 0.097808 | -0.11398 | -0.01935 |
| IER2    | 0.238109 | 0.405823 | 0.042702 | -0.12591 | 0.032733 | -0.10795 | 0.503337 | -0.03074 | -0.16429 | 0.375635 |
| NAV2    | 0.231269 | 0.129688 | 0.166724 | -0.2351  | 0.199446 | 0.133696 | -0.27566 | 0.008343 | -0.33881 | -0.08819 |
| CD81    | 0.228316 | 0.575909 | -0.06195 | 0.559592 | -0.08571 | 0.191777 | 0.066098 | 0.015773 | -0.08115 | -0.11409 |
| BOK     | 0.223567 | 0.295302 | 0.103725 | 0.057107 | 0.258373 | 0.17756  | 0.113992 | 0.240894 | -0.1742  | -0.02916 |
| JUN     | 0.202962 | -0.00419 | -0.09405 | -0.23949 | -0.11932 | -0.03807 | 0.470624 | 0.011544 | -0.10436 | 0.321536 |
| CLDN14  | 0.198814 | 0.708472 | 0.334624 | -0.17455 | 0.008719 | -0.16784 | -0.0896  | 0.354837 | 0.327297 | -0.01742 |
| ZFAND5  | 0.186568 | 0.469518 | 0.192263 | -0.18268 | -0.20128 | -0.17097 | 0.205571 | -0.11146 | 0.100346 | 0.214545 |
| CD47    | 0.142721 | 0.461246 | -0.16662 | 0.225667 | -0.25081 | 0.103214 | -0.07725 | -0.32263 | 0.192238 | -0.14401 |
| JPT1    | 0.135845 | 0.142942 | 0.499525 | -0.57312 | 0.006878 | -0.05347 | 0.112399 | 0.100994 | 0.046866 | -0.02348 |
| MYL12B  | 0.125609 | -0.11756 | 0.33101  | -0.6381  | -0.1593  | -0.1231  | 0.094045 | 0.08413  | 0.16909  | 0.055682 |
| PCBP1   | 0.123264 | 0.367451 | 0.200839 | -0.41947 | 0.053137 | -0.107   | 0.126689 | 0.147456 | -0.25422 | 0.015397 |
| IDH1    | 0.121005 | -0.41294 | 0.264202 | -0.36192 | 0.176338 | -0.05535 | -0.13305 | 0.054562 | 0.13284  | -0.14248 |
| MMP15   | 0.102126 | -0.34789 | 0.188677 | -0.60742 | 0.082866 | 0.106704 | 0.100378 | 0.247607 | -0.32991 | -0.08421 |
| PHLDA1  | 0.095068 | 0.797461 | -0.09239 | 0.140671 | 0.158346 | 0.086916 | 0.164556 | -0.00789 | 0.011019 | 0.220709 |
| ISYNA1  | 0.049139 | 0.193    | -0.25455 | 0.503173 | -0.07533 | 0.210626 | 0.060409 | 0.062809 | -0.19819 | -0.07775 |
| ACTB    | 0.041502 | 0.515675 | 0.333724 | -0.24679 | 0.043194 | -0.07846 | 0.17092  | 0.137984 | -0.24169 | -0.01435 |
| CDO1    | 0.028264 | 0.067418 | -0.37112 | 0.570286 | -0.26092 | 0.417698 | -0.11116 | 0.351571 | 0.068419 | 0.205762 |
| CFL1    | 0.021352 | -0.02834 | 0.467465 | -0.511   | 0.011357 | -0.09269 | 0.176967 | 0.18113  | -0.1794  | -0.12402 |
| TMC4    | -0.00183 | -0.61443 | 0.052199 | -0.53983 | -0.02421 | 0.179896 | 0.085605 | 0.128813 | -0.15566 | -0.10419 |
| TNIP3   | -0.00739 | 0.835263 | 0.079608 | -0.20422 | -0.2301  | -0.04983 | -0.25621 | -0.0592  | -0.07856 | 0.091651 |
| ENY2    | -0.04444 | -0.00801 | 0.039417 | -0.01159 | 0.214131 | -0.07102 | -0.08916 | -0.08282 | 0.192067 | 0.113284 |
| MUC13   | -0.0543  | 0.018535 | -0.08395 | -0.82321 | -0.09298 | 0.286961 | 0.035808 | 0.100091 | -0.08731 | 0.034467 |
| IFITM3  | -0.07233 | 0.824854 | 0.12197  | 0.005641 | 0.048964 | 0.112774 | -0.03369 | 0.041319 | -0.2183  | -0.16719 |
| BTG1    | -0.07856 | -0.20792 | 0.087626 | 0.002849 | -0.33616 | -0.15475 | 0.140514 | -0.18082 | 0.233111 | 0.071505 |
| SDHAF1  | -0.09247 | -0.23602 | 0.046723 | -0.04401 | 0.138403 | -0.01841 | -0.05574 | 0.129411 | -0.09463 | -0.07108 |
| ZYX     | -0.09297 | 0.742611 | 0.076328 | 0.077201 | 0.139968 | -0.00261 | 0.269521 | 0.106693 | -0.25535 | 0.012871 |
| NECTIN2 | -0.10483 | 0.502989 | 0.08611  | -0.54091 | 0.067253 | -0.05302 | 0.299082 | 0.127279 | -0.16946 | -0.00726 |

|          |          |          |          |          |          |          |          |          |          |          |
|----------|----------|----------|----------|----------|----------|----------|----------|----------|----------|----------|
| TACSTD2  | -0.12451 | 0.612215 | 0.225212 | 0.052743 | 0.091102 | 0.269098 | 0.191091 | 0.131593 | 0.11538  | -0.1782  |
| CBX3     | -0.12851 | 0.348979 | -0.22504 | -0.00358 | 0.30983  | 0.048705 | -0.13363 | -0.10978 | 0.210306 | -0.03512 |
| ECSCR    | -0.1638  | 0.605992 | -0.14565 | 0.338227 | 0.155009 | 0.157885 | -0.04045 | 0.130572 | -0.03354 | 0.076579 |
| ICAM1    | -0.17326 | 0.848646 | -0.0759  | 0.173317 | -0.24612 | 0.080643 | 0.122173 | -0.0937  | -0.04814 | -0.08938 |
| PGLYRP1  | -0.18751 | 0.231217 | 0.152882 | 0.132063 | -0.03953 | -0.16038 | 0.230816 | 0.068718 | -0.12788 | -0.19069 |
| NCF4     | -0.19504 | 0.608686 | -0.0259  | 0.392778 | -0.33014 | 0.02685  | 0.130876 | -0.06703 | 0.023254 | -0.13074 |
| GPX1     | -0.19606 | 0.57625  | 0.129382 | 0.221529 | 0.048344 | -0.04716 | 0.183844 | 0.117711 | -0.05096 | -0.155   |
| CTSB     | -0.19829 | 0.654142 | -0.03946 | -0.02482 | -0.1305  | -0.17172 | 0.129735 | 0.030099 | 0.054853 | -0.00681 |
| NFKBIA   | -0.21606 | 0.491024 | -0.11058 | -0.072   | -0.38326 | -0.21679 | 0.361031 | -0.09016 | 0.009643 | 0.124444 |
| GUCA2B   | -0.22412 | -0.74779 | -0.11759 | -0.21298 | -0.38909 | 0.044341 | 0.057189 | 0.174615 | -0.07261 | 0.16115  |
| CEBPD    | -0.22903 | 0.61266  | 0.013705 | -0.17991 | -0.00641 | -0.04876 | 0.180987 | -0.00845 | -0.18955 | 0.099193 |
| TIFA     | -0.23722 | 0.628538 | -0.15943 | 0.10524  | -0.16791 | 0.111202 | 0.043289 | -0.23188 | 0.084641 | -0.10241 |
| TCIM     | -0.2389  | 0.520413 | 0.139878 | -0.06848 | 0.221553 | -0.00575 | 0.263774 | 0.050678 | -0.08055 | 0.44853  |
| CXCL16   | -0.25254 | 0.559018 | -0.25083 | -0.30714 | 0.124888 | 0.002633 | 0.317081 | 0.124232 | -0.09626 | 0.061587 |
| PSMA6    | -0.25546 | 0.375199 | 0.082824 | -0.39111 | -0.02975 | -0.14314 | -0.08998 | 0.0444   | 0.026933 | -0.01492 |
| TPD52L2  | -0.27604 | 0.4781   | 0.064614 | -0.24967 | 0.151913 | -0.16477 | 0.090417 | 0.086872 | -0.01247 | 0.107093 |
| DAP      | -0.27968 | 0.196142 | -0.07664 | -0.56796 | 0.340714 | -0.03794 | -0.04117 | 0.118884 | -0.19045 | 0.069298 |
| NFKB2    | -0.2945  | 0.69032  | -0.1454  | 0.125832 | -0.22256 | 0.0686   | 0.266953 | -0.09999 | -0.0531  | -0.0213  |
| PSMB8    | -0.32077 | 0.585242 | 0.21942  | -0.32845 | -0.12226 | -0.05152 | -0.12217 | -0.08519 | 0.00887  | -0.22004 |
| CSAD     | -0.32319 | -0.25577 | 0.078666 | -0.04547 | 0.097062 | -0.15362 | 0.007527 | 0.063717 | -0.19092 | 0.011237 |
| PNRC1    | -0.33872 | 0.308079 | -0.40513 | 0.286087 | -0.26762 | 0.011018 | 0.176614 | -0.12122 | 0.037804 | -0.072   |
| TMEM176B | -0.34373 | -0.05064 | -0.16129 | -0.31947 | -0.22502 | 0.079102 | 0.028318 | 0.014102 | -0.18684 | -0.07944 |
| TAPBP    | -0.3541  | 0.466842 | 0.032008 | -0.32306 | -0.14283 | -0.05221 | 0.034359 | -0.01453 | -0.29213 | -0.22232 |
| LY6E     | -0.3745  | 0.635718 | -0.16863 | 0.350563 | -0.06297 | 0.112856 | 0.052755 | 0.035441 | -0.11405 | -0.18373 |
| TNF      | -0.37884 | 0.554752 | -0.14378 | 0.227326 | -0.41781 | 0.079914 | 0.145    | -0.13677 | -0.02322 | -0.17549 |
| REEP3    | -0.39792 | -0.19709 | -0.44114 | -0.44017 | 0.161791 | -0.09247 | 0.123785 | 0.074608 | 0.126549 | 0.248427 |
| SOD1     | -0.44804 | 0.308811 | 0.281855 | -0.4652  | -0.04125 | 0.028994 | -0.2001  | -0.04246 | 0.038217 | -0.1336  |
| GSDMD    | -0.47219 | 0.390757 | 0.080116 | -0.36322 | -0.18202 | -0.08855 | 0.01753  | 0.00545  | -0.07739 | -0.15997 |
| IFNGR1   | -0.50102 | 0.24699  | -0.15201 | -0.43628 | -0.2409  | -0.10767 | 0.157668 | -0.04121 | 0.187562 | 0.177011 |
| B2M      | -0.52924 | 0.292061 | -0.06782 | -0.37996 | -0.30649 | -0.13606 | -0.01332 | -0.12179 | 0.162713 | -0.04063 |
| TNFSF10  | -0.54079 | -0.03106 | -0.11443 | -0.46866 | -0.3478  | -0.13691 | -0.10038 | -0.06534 | 0.100502 | -0.04607 |
| PSME1    | -0.56242 | 0.464426 | 0.00421  | -0.33112 | -0.08344 | -0.06544 | -0.11979 | -0.05633 | 0.016212 | -0.1864  |
| RELB     | -0.56378 | 0.138442 | 0.060792 | -0.06059 | -0.40923 | -0.11347 | 0.280215 | 0.046713 | -0.08076 | -0.06337 |
| CD74     | -0.62831 | 0.500024 | -0.28357 | 0.05872  | -0.16301 | 0.086274 | -0.03572 | -0.00347 | -0.14122 | -0.18386 |
| ZFP36L1  | -0.62842 | 0.326681 | -0.17518 | 0.189575 | -0.0433  | -0.01194 | 0.233795 | -0.06    | -0.0697  | 0.022043 |

|          |          |          |          |          |          |          |          |          |          |          |
|----------|----------|----------|----------|----------|----------|----------|----------|----------|----------|----------|
| CTSH     | -0.63047 | 0.48876  | -0.23213 | 0.24025  | -0.10264 | 0.015823 | 0.067923 | -0.01183 | 0.043321 | -0.08436 |
| GSTO1    | -0.63189 | 0.192616 | -0.21993 | -0.15797 | 0.215757 | -0.15609 | -0.04302 | 0.09654  | 0.003314 | 0.018222 |
| PSME2    | -0.63717 | 0.44633  | -0.08829 | -0.30904 | 0.045226 | -0.02311 | -0.09939 | 0.034991 | -0.11967 | -0.16051 |
| TMEM176A | -0.64788 | -0.16319 | -0.14576 | -0.22406 | -0.14229 | 0.032084 | 0.016622 | 0.050821 | -0.16544 | -0.03815 |
| NEURL3   | -0.64882 | -0.24086 | -0.05296 | -0.2455  | -0.41973 | -0.16397 | -0.04411 | 0.145705 | -0.07768 | -0.21532 |
| CNN3     | -0.67232 | 0.088756 | 0.160368 | 0.137115 | 0.111898 | -0.03811 | -0.08715 | 0.034281 | -0.03782 | -0.0993  |
| ENO3     | -0.69144 | -0.01714 | -0.25004 | 0.018546 | 0.038825 | -0.10248 | 0.060411 | 0.121095 | -0.14353 | -0.00123 |
| CASP4    | -0.74957 | 0.396291 | -0.31468 | 0.014459 | 0.044381 | -0.07217 | 0.015704 | 0.006093 | 0.057359 | 0.092649 |
| SULT2B1  | -0.75093 | -0.11315 | -0.03414 | -0.09114 | 0.157609 | 0.025201 | -0.04001 | 0.344426 | -0.29005 | -0.09473 |
| BIRC3    | -0.75166 | 0.396349 | -0.17677 | -0.21133 | -0.22377 | 0.027525 | -0.02067 | -0.10961 | 0.07824  | -0.02696 |
| TM4SF20  | -0.8781  | -0.02663 | -0.23443 | -0.26981 | 0.077792 | 0.195122 | 0.098608 | -0.05899 | 0.157184 | -0.00411 |
