# Supplementary material
Source: PubMed Central journal article supplement (PMC9998338)
Supplement: NIHMS1841867-supplement-Supp6.pdf [file NIHMS1841867-supplement-Supp6.pdf]

**Supplementary Table 4: The raw cell count for M cell rescue (Relate to Figure 4E)  
The raw cell count for TNF $\alpha$  stimulated samples**

| <b>KO_1</b> |              |      |       |  |       |      |       |  |          |      |       |
|-------------|--------------|------|-------|--|-------|------|-------|--|----------|------|-------|
|             | No treatment |      |       |  | H2O2  |      |       |  | Paraquat |      |       |
|             | UEA-1        | DAPI | %     |  | UEA-1 | DAPI | %     |  | UEA-1    | DAPI | %     |
| Location 1  | 44           | 310  | 14.19 |  | 31    | 266  | 11.65 |  | 29       | 176  | 16.48 |
| Location 2  | 168          | 662  | 25.38 |  | 41    | 248  | 16.53 |  | 27       | 250  | 10.80 |
| Location 3  | 182          | 579  | 31.43 |  | 36    | 277  | 13.00 |  | 62       | 313  | 19.81 |
| Location 4  | 60           | 201  | 29.85 |  | 11    | 188  | 5.85  |  | 62       | 411  | 15.09 |
| Location 5  | 77           | 357  | 21.57 |  | 11    | 368  | 2.99  |  | 38       | 168  | 22.62 |
| Location 6  | 119          | 516  | 23.06 |  | 5     | 252  | 1.98  |  | 103      | 460  | 22.39 |
| Location 7  | 165          | 615  | 26.83 |  | 188   | 567  | 33.16 |  | 57       | 270  | 21.11 |
|             |              | AVE  | 24.62 |  |       | AVE  | 12.17 |  |          | AVE  | 18.33 |

| <b>KO_2</b> |              |      |       |  |       |      |       |  |          |      |       |
|-------------|--------------|------|-------|--|-------|------|-------|--|----------|------|-------|
|             | No treatment |      |       |  | H2O2  |      |       |  | Paraquat |      |       |
|             | UEA-1        | DAPI | %     |  | UEA-1 | DAPI | %     |  | UEA-1    | DAPI | %     |
| Location 1  | 128          | 604  | 21.19 |  | 48    | 325  | 14.77 |  | 52       | 214  | 24.30 |
| Location 2  | 64           | 391  | 16.37 |  | 54    | 480  | 11.25 |  | 60       | 389  | 15.42 |
| Location 3  | 35           | 448  | 7.81  |  | 31    | 486  | 6.38  |  | 56       | 388  | 14.43 |
| Location 4  | 11           | 354  | 3.11  |  | 38    | 345  | 11.01 |  | 42       | 341  | 12.32 |
| Location 5  | 205          | 518  | 39.58 |  | 0     | 234  | 0.00  |  | 40       | 336  | 11.90 |
| Location 6  | 64           | 384  | 16.67 |  | 36    | 309  | 11.65 |  | 60       | 385  | 15.58 |
| Location 7  | 138          | 488  | 28.28 |  | 48    | 518  | 9.27  |  | 64       | 526  | 12.17 |
|             |              | AVE  | 19.00 |  |       | AVE  | 9.19  |  |          | AVE  | 15.16 |

| <b>KO_3</b> |              |      |       |  |       |      |       |  |          |      |       |
|-------------|--------------|------|-------|--|-------|------|-------|--|----------|------|-------|
|             | No treatment |      |       |  | H2O2  |      |       |  | Paraquat |      |       |
|             | UEA-1        | DAPI | %     |  | UEA-1 | DAPI | %     |  | UEA-1    | DAPI | %     |
| Location 1  | 187          | 400  | 46.75 |  | 85    | 330  | 25.76 |  | 100      | 189  | 52.91 |
| Location 2  | 209          | 396  | 52.78 |  | 59    | 217  | 27.19 |  | 55       | 172  | 42.97 |
| Location 3  | 83           | 220  | 37.73 |  | 20    | 155  | 12.90 |  | 138      | 332  | 41.57 |
| Location 4  | 204          | 346  | 58.96 |  | 50    | 220  | 22.73 |  | 83       | 128  | 48.26 |
| Location 5  | 133          | 223  | 59.64 |  | 37    | 162  | 22.84 |  | 117      | 231  | 50.65 |
| Location 6  | 124          | 242  | 51.24 |  | 71    | 276  | 25.72 |  | 99       | 168  | 58.93 |
| Location 7  | 76           | 198  | 38.38 |  | 59    | 219  | 26.94 |  | 46       | 106  | 43.40 |
|             |              | AVE  | 49.35 |  |       | AVE  | 23.44 |  |          | AVE  | 48.38 |

**KO\_4**

|            | No treatment |      |       |  | H2O2  |      |       |  | Paraquat |      |       |
|------------|--------------|------|-------|--|-------|------|-------|--|----------|------|-------|
|            | UEA-1        | DAPI | %     |  | UEA-1 | DAPI | %     |  | UEA-1    | DAPI | %     |
| Location 1 | 113          | 637  | 17.74 |  | 32    | 338  | 9.47  |  | 13       | 156  | 8.33  |
| Location 2 | 75           | 502  | 14.94 |  | 100   | 446  | 22.42 |  | 28       | 199  | 14.07 |
| Location 3 | 215          | 492  | 43.70 |  | 30    | 245  | 12.24 |  | 31       | 341  | 9.09  |
| Location 4 | 80           | 349  | 22.92 |  | 15    | 404  | 3.71  |  | 53       | 186  | 28.49 |
| Location 5 | 140          | 300  | 46.67 |  | 10    | 323  | 3.10  |  | 45       | 145  | 31.03 |
| Location 6 | 52           | 299  | 17.39 |  | 49    | 193  | 25.39 |  | 20       | 199  | 10.05 |
| Location 7 | 245          | 769  | 31.86 |  | 62    | 180  | 34.44 |  | 65       | 387  | 16.80 |
|            |              | AVE  | 27.89 |  |       | AVE  | 15.83 |  |          | AVE  | 16.84 |

**KO\_5**

|            | No treatment |      |       |  | H2O2  |      |       |  | Paraquat |      |       |
|------------|--------------|------|-------|--|-------|------|-------|--|----------|------|-------|
|            | UEA-1        | DAPI | %     |  | UEA-1 | DAPI | %     |  | UEA-1    | DAPI | %     |
| Location 1 | 75           | 380  | 19.74 |  | 8     | 164  | 4.88  |  | 86       | 282  | 30.50 |
| Location 2 | 97           | 542  | 17.90 |  | 94    | 490  | 19.18 |  | 11       | 277  | 3.97  |
| Location 3 | 138          | 671  | 20.57 |  | 2     | 195  | 1.03  |  | 85       | 256  | 33.20 |
| Location 4 | 45           | 459  | 9.80  |  | 17    | 307  | 5.54  |  | 23       | 249  | 9.24  |
| Location 5 | 125          | 212  | 58.96 |  | 4     | 137  | 2.92  |  | 33       | 287  | 11.50 |
| Location 6 | 129          | 493  | 26.17 |  | 77    | 323  | 23.84 |  | 141      | 662  | 21.30 |
| Location 7 | 189          | 702  | 26.92 |  | 108   | 626  | 17.25 |  | 15       | 357  | 4.20  |
|            |              | AVE  | 25.72 |  |       | AVE  | 10.66 |  |          | AVE  | 16.27 |

**KO\_6**

|            | No treatment |      |       |  | H2O2  |      |       |  | Paraquat |      |       |
|------------|--------------|------|-------|--|-------|------|-------|--|----------|------|-------|
|            | UEA-1        | DAPI | %     |  | UEA-1 | DAPI | %     |  | UEA-1    | DAPI | %     |
| Location 1 | 71           | 279  | 25.45 |  | 35    | 236  | 14.83 |  | 15       | 125  | 12.00 |
| Location 2 | 76           | 280  | 27.14 |  | 48    | 216  | 22.22 |  | 57       | 309  | 18.45 |
| Location 3 | 68           | 313  | 21.73 |  | 38    | 210  | 18.10 |  | 36       | 276  | 13.04 |
| Location 4 | 49           | 175  | 28.00 |  | 10    | 183  | 5.46  |  | 46       | 219  | 21.00 |
| Location 5 | 100          | 377  | 26.53 |  | 85    | 368  | 23.10 |  | 109      | 275  | 39.64 |
| Location 6 | 105          | 446  | 23.54 |  | 85    | 368  | 23.10 |  | 105      | 253  | 41.50 |
| Location 7 | 95           | 398  | 23.87 |  | 70    | 357  | 19.61 |  | 61       | 392  | 15.56 |
|            |              | AVE  | 25.18 |  |       | AVE  | 18.06 |  |          | AVE  | 23.03 |

# The raw cell count for RANKL Stimulated samples

## KO\_1

|            | No treatment |      |       |  | H2O2  |      |       |  | Paraquat |      |       |
|------------|--------------|------|-------|--|-------|------|-------|--|----------|------|-------|
|            | UEA-1        | DAPI | %     |  | UEA-1 | DAPI | %     |  | UEA-1    | DAPI | %     |
| Location 1 | 221          | 758  | 29.16 |  | 9     | 232  | 3.88  |  | 44       | 236  | 18.64 |
| Location 2 | 116          | 535  | 21.68 |  | 26    | 416  | 6.25  |  | 92       | 420  | 21.90 |
| Location 3 | 71           | 696  | 10.20 |  | 7     | 304  | 2.30  |  | 59       | 420  | 14.05 |
| Location 4 | 40           | 286  | 13.99 |  | 7     | 296  | 2.36  |  | 47       | 407  | 11.55 |
| Location 5 | 192          | 495  | 38.79 |  | 7     | 279  | 2.51  |  | 143      | 464  | 30.82 |
| Location 6 | 21           | 192  | 10.94 |  | 77    | 449  | 17.15 |  | 38       | 236  | 16.10 |
| Location 7 | 33           | 554  | 5.96  |  | 80    | 445  | 17.98 |  | 77       | 550  | 14.00 |
|            |              | AVE  | 18.67 |  |       |      | 7.49  |  |          |      | 18.15 |

## KO\_2

|            | No treatment |      |       |  | H2O2  |      |       |  | Paraquat |      |       |
|------------|--------------|------|-------|--|-------|------|-------|--|----------|------|-------|
|            | UEA-1        | DAPI | %     |  | UEA-1 | DAPI | %     |  | UEA-1    | DAPI | %     |
| Location 1 | 174          | 749  | 23.23 |  | 99    | 481  | 20.58 |  | 58       | 245  | 23.67 |
| Location 2 | 130          | 606  | 21.45 |  | 182   | 571  | 31.87 |  | 53       | 420  | 12.62 |
| Location 3 | 276          | 424  | 65.09 |  | 49    | 512  | 9.57  |  | 66       | 402  | 16.42 |
| Location 4 | 20           | 503  | 3.98  |  | 10    | 217  | 4.61  |  | 31       | 279  | 11.11 |
| Location 5 | 45           | 330  | 13.64 |  | 15    | 285  | 5.26  |  | 61       | 306  | 19.93 |
| Location 6 | 91           | 573  | 15.88 |  | 3     | 185  | 1.62  |  | 90       | 498  | 18.07 |
| Location 7 | 48           | 513  | 9.36  |  | 73    | 545  | 13.39 |  | 35       | 337  | 10.39 |
|            |              | AVE  | 21.80 |  |       |      | 12.42 |  |          |      | 16.03 |

## KO\_3

|            | No treatment |      |       |  | H2O2  |      |       |  | Paraquat |      |       |
|------------|--------------|------|-------|--|-------|------|-------|--|----------|------|-------|
|            | UEA-1        | DAPI | %     |  | UEA-1 | DAPI | %     |  | UEA-1    | DAPI | %     |
| Location 1 | 306          | 677  | 45.20 |  | 206   | 639  | 32.24 |  | 56       | 227  | 24.67 |
| Location 2 | 191          | 561  | 34.05 |  | 216   | 541  | 39.93 |  | 103      | 343  | 30.03 |
| Location 3 | 122          | 302  | 40.40 |  | 64    | 314  | 20.38 |  | 151      | 313  | 48.24 |
| Location 4 | 161          | 400  | 40.25 |  | 88    | 324  | 27.16 |  | 29       | 113  | 25.66 |
| Location 5 | 70           | 264  | 26.52 |  | 39    | 198  | 19.70 |  | 81       | 249  | 32.53 |
| Location 6 | 104          | 242  | 42.98 |  | 54    | 227  | 23.79 |  | 96       | 206  | 46.60 |
| Location 7 | 139          | 284  | 48.94 |  | 116   | 433  | 26.79 |  | 51       | 182  | 28.02 |
|            |              | AVE  | 39.76 |  |       |      | 27.14 |  |          |      | 33.68 |

**KO\_4**

|            | No treatment |      |       |  | H2O2  |      |       |  | Paraquat |      |       |
|------------|--------------|------|-------|--|-------|------|-------|--|----------|------|-------|
|            | UEA-1        | DAPI | %     |  | UEA-1 | DAPI | %     |  | UEA-1    | DAPI | %     |
| Location 1 | 476          | 1270 | 37.48 |  | 44    | 634  | 6.94  |  | 8        | 305  | 2.62  |
| Location 2 | 167          | 502  | 33.27 |  | 121   | 492  | 24.59 |  | 27       | 423  | 6.38  |
| Location 3 | 171          | 745  | 22.95 |  | 104   | 579  | 17.96 |  | 48       | 622  | 7.72  |
| Location 4 | 67           | 726  | 9.23  |  | 48    | 423  | 11.35 |  | 21       | 408  | 5.15  |
| Location 5 | 516          | 842  | 61.28 |  | 36    | 426  | 8.45  |  | 5        | 186  | 2.69  |
| Location 6 | 47           | 675  | 6.96  |  | 46    | 276  | 16.67 |  | 23       | 486  | 4.73  |
| Location 7 | 192          | 896  | 21.43 |  | 418   | 1573 | 26.57 |  | 285      | 750  | 38.00 |
|            |              | AVE  | 27.51 |  |       |      | 16.08 |  |          |      | 9.61  |

**KO\_5**

|            | No treatment |      |       |  | H2O2  |      |       |  | Paraquat |      |       |
|------------|--------------|------|-------|--|-------|------|-------|--|----------|------|-------|
|            | UEA-1        | DAPI | %     |  | UEA-1 | DAPI | %     |  | UEA-1    | DAPI | %     |
| Location 1 | 235          | 884  | 26.58 |  | 120   | 564  | 21.28 |  | 214      | 653  | 32.77 |
| Location 2 | 38           | 159  | 23.90 |  | 63    | 564  | 11.17 |  | 78       | 550  | 14.18 |
| Location 3 | 96           | 520  | 18.46 |  | 114   | 533  | 21.39 |  | 34       | 506  | 6.72  |
| Location 4 | 83           | 559  | 14.85 |  | 6     | 281  | 2.14  |  | 40       | 335  | 11.94 |
| Location 5 | 147          | 589  | 24.96 |  | 4     | 208  | 1.92  |  | 45       | 317  | 14.20 |
| Location 6 | 264          | 932  | 28.33 |  | 124   | 456  | 27.19 |  | 81       | 372  | 21.77 |
| Location 7 | 188          | 502  | 37.45 |  | 55    | 490  | 11.22 |  | 148      | 774  | 19.12 |
|            |              | AVE  | 24.93 |  |       |      | 13.76 |  |          |      | 17.24 |

**KO\_6**

|            | No treatment |      |       |  | H2O2  |      |       |  | Paraquat |      |       |
|------------|--------------|------|-------|--|-------|------|-------|--|----------|------|-------|
|            | UEA-1        | DAPI | %     |  | UEA-1 | DAPI | %     |  | UEA-1    | DAPI | %     |
| Location 1 | 138          | 368  | 37.50 |  | 254   | 670  | 37.91 |  | 77       | 244  | 31.56 |
| Location 2 | 178          | 431  | 41.30 |  | 106   | 331  | 32.02 |  | 96       | 225  | 26.82 |
| Location 3 | 96           | 378  | 25.40 |  | 88    | 327  | 26.91 |  | 56       | 204  | 27.45 |
| Location 4 | 96           | 283  | 33.92 |  | 26    | 177  | 14.69 |  | 112      | 358  | 49.78 |
| Location 5 | 72           | 253  | 28.46 |  | 30    | 199  | 15.08 |  | 32       | 138  | 23.19 |
| Location 6 | 160          | 361  | 44.32 |  | 61    | 292  | 20.89 |  | 32       | 220  | 14.55 |
| Location 7 | 90           | 375  | 24.00 |  | 148   | 459  | 32.24 |  | 125      | 314  | 39.81 |
|            |              | AVE  | 33.56 |  |       |      | 25.68 |  |          |      | 30.45 |

## The summary of M cell percentage and statistical test for TNF $\alpha$ and RANKL stimulated samples

|                            | KO_1  | KO_2  | KO_3  | KO_4  | KO_5  | KO_6  |
|----------------------------|-------|-------|-------|-------|-------|-------|
| RANK_No treatment          | 18.67 | 21.80 | 39.76 | 27.51 | 24.93 | 33.56 |
| RANK_H2O2                  | 7.49  | 12.42 | 27.14 | 16.08 | 13.76 | 25.68 |
| RANK_PARA                  | 18.15 | 16.03 | 33.68 | 9.61  | 17.24 | 30.45 |
|                            |       |       |       |       |       |       |
| TNF $\alpha$ _No treatment | 24.62 | 19.00 | 49.35 | 27.89 | 25.72 | 25.18 |
| TNF $\alpha$ _H2O2         | 12.17 | 9.19  | 23.44 | 15.83 | 10.66 | 18.06 |
| TNF $\alpha$ _PARA         | 18.33 | 15.16 | 48.38 | 16.84 | 16.27 | 23.03 |

## Wilcoxon test summary

| GROUP1                    | GROUP2                        | P VALUE | P VALUE SUMMARY |
|---------------------------|-------------------------------|---------|-----------------|
| KO_TNF $\alpha$ _H2O2     | KO_TNF $\alpha$ _No treatment | 0.0312  | *               |
| KO_TNF $\alpha$ _paraquat | KO_TNF $\alpha$ _No treatment | 0.0312  | *               |
| KO_RANKL_H2O2             | KO_RANKL_No treatment         | 0.0312  | *               |
| KO_RANKL_Paraquat         | KO_RANKL_No treatment         | 0.0312  | *               |
